# Supplementary material for: The central amygdala modulates distinctive conflict-like behaviors in a naturalistic foraging task
Source: Frontiers journal article supplement (doi:10.3389/fnbeh.2023.1212884), 2023-08-02
Supplement: Data_Sheet_1.pdf [file Data_Sheet_1.pdf]

## *Supplementary Material*

# **The central amygdala modulates distinctive conflict-like behaviors in a naturalistic foraging task**

**Sunwhi Kimm<sup>1</sup>, Jeansok J Kim<sup>2</sup> and June-Seek Choi<sup>1\*</sup>**

**\* Correspondence:**

Corresponding Author:

Dr. June-Seek Choi: [j-schoi@korea.ac.kr](mailto:j-schoi@korea.ac.kr)

## **1 Supplementary Figures and Tables**

|            | <b>Uninsulated tip</b> | <b>Anterior/Posterior</b> | <b>Medial/Lateral</b> | <b>Ventral</b> | <b>Current</b> | <b>Duration (s)</b> |
|------------|------------------------|---------------------------|-----------------------|----------------|----------------|---------------------|
| <b>CeA</b> | 0.5 mm                 | -2.2                      | $\pm 4.0$             | -8.0, -8.5     | 1.0 mA         | 10                  |
|            |                        | -2.8                      | $\pm 4.3$             | -8.0           | 1.0 mA         | 10                  |

**Supplementary Table 1. Coordinates and parameters of electrolytic lesion**

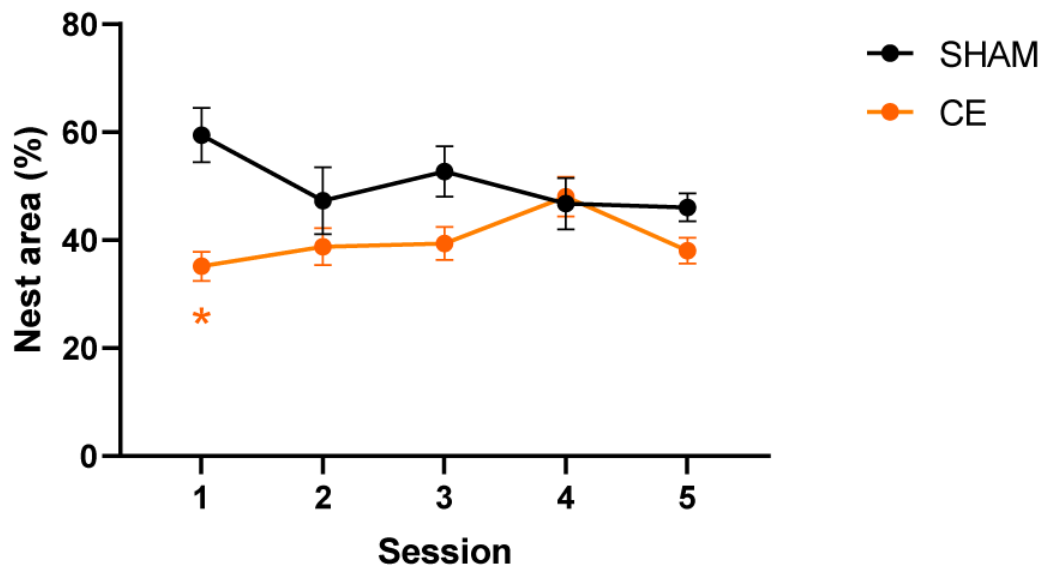

**Supplementary Figure 1. Time spent in Nest area**

Time spent in Nest area. An asterisk (\*) indicate statistically significant difference between groups ( $p < 0.05$ ).

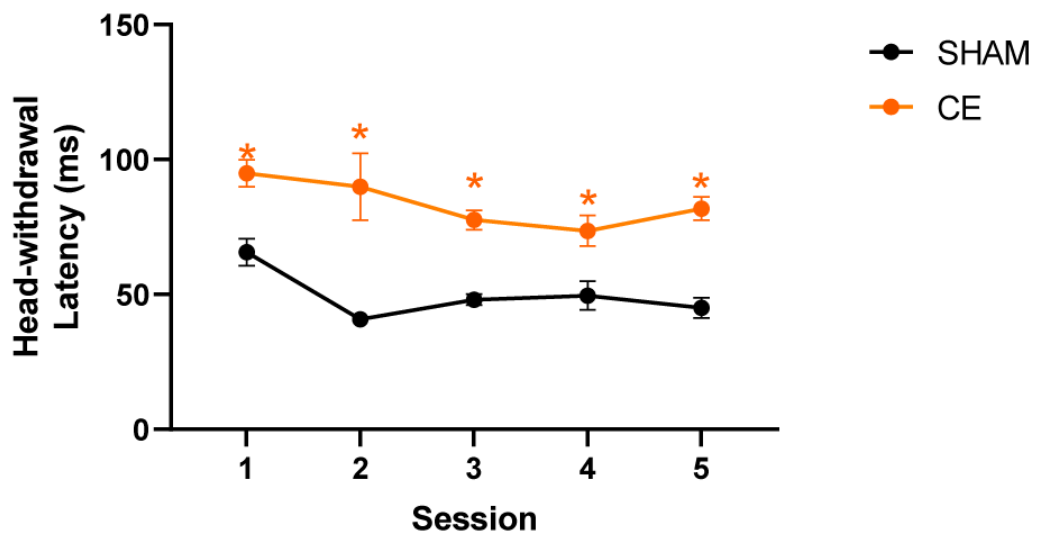

### Supplementary Figure 2. Head-withdrawal latency

Latency to withdraw head from the onset of the Lobsterbot's attack. Timescale is at milliseconds. An asterisk (\*) indicate statistically significant difference between groups ( $p < 0.05$ ).

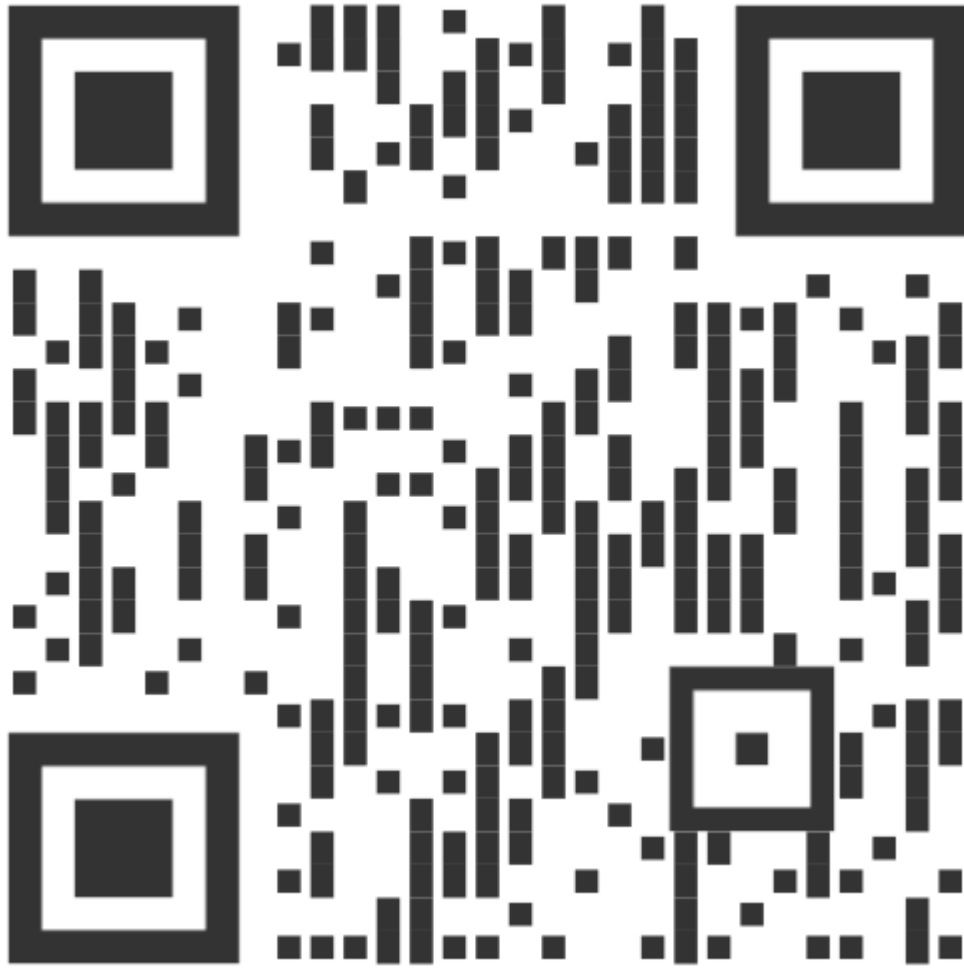

**Supplementary Video 1. Lobsterbot task and effects of central amygdala lesion**

URL: <https://youtu.be/xdPYV0XKYRk>
